# Supplementary material for: Elucidation of molecular and hormonal background of early growth cessation and endodormancy induction in two contrasting Populus hybrid cultivars
Source: Research Square preprint supplement (doi:10.21203/rs.3.rs-71177/v2), 2020-12-08
Supplement: Supplementary file 1 [file 4a693607431e67dc9e9b7e1a.docx]

### **Supplemented Figure 1** Relative expression levels in buds (panel A-E) and in leaves (panel F-K) of the *PtCBF1, PtCBF2, PtCBF3, PtCBF4, PtCBF5* and *PtCBF6* genes in the Okanese (black bars) and Walker (white bars) genotypes. The expression levels were determined by the ΔΔCt method. *Pt18S* rRNA gene was used as a housekeeping gene for normalization. Mean expression values were normalized per the expression level at the zero sampling time-point, separately for each genotype. The expression values are presented in log2 scale. Error bars represent the ±SEM originating from 3 biological and 3 technical replicates. ‘nd’: the expression level was undetectable.

### **Supplemented Figure 2** Heatmap of the combined phytohormone concentration in leaves (L) and expression of *CBF*s and *DAM* genes (leaves (L) and buds (B)) in ‘Okanese’ (Ok) and ‘Walker’ (Wa) poplar hybrid cultivars over the 60-day short photoperiod and low night temperature growth cessation/dormancy induction treatment.

**Supplemented Table 1** Sequences, melting temperatures and GC contents of the primers used in the study. All the primer sequences listed, with exception of *PtDAM1,* were collected from the work of Menon et al. (2015) [57].
